# Supplementary material for: Identification and Validation of Genetic Variants that Influence Transcription Factor and Cell Signaling Protein Levels
Source: PubMed Central journal article supplement (PMC4129400; doi:10.1016/j.ajhg.2014.07.005), 2014-08-07
Supplement: mmc1.pdf [file mmc1.pdf]

The American Journal of Human Genetics, Volume 95

Supplemental Data

**Identification and Validation of Genetic Variants  
that Influence Transcription Factor  
and Cell Signaling Protein Levels**

Ronald J. Hause, Jr., Amy L. Stark, Nirav N. Antao, Lidija K. Gorsic, Sophie H. Chung,  
Christopher D. Brown, Shan S. Wong, Daniel F. Gill, Jamie L. Myers, Lida Anita To,  
Kevin P. White, M. Eileen Dolan, and Richard Baker Jones

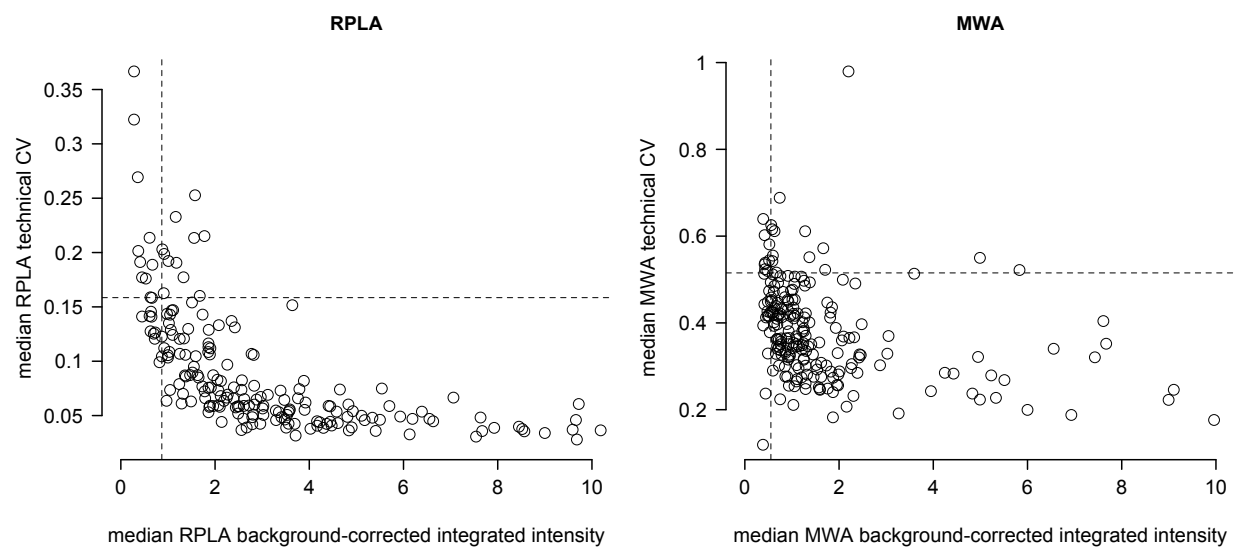

**Figure S1: Technical variation plotted against antibody quality.** Scatter plots of median background-corrected integrated intensities and median signal-to-noise ratios across all samples versus the median technical coefficient of variation for each antibody. Lines designate the filtering thresholds we used for selecting high-confidence protein quantifications.

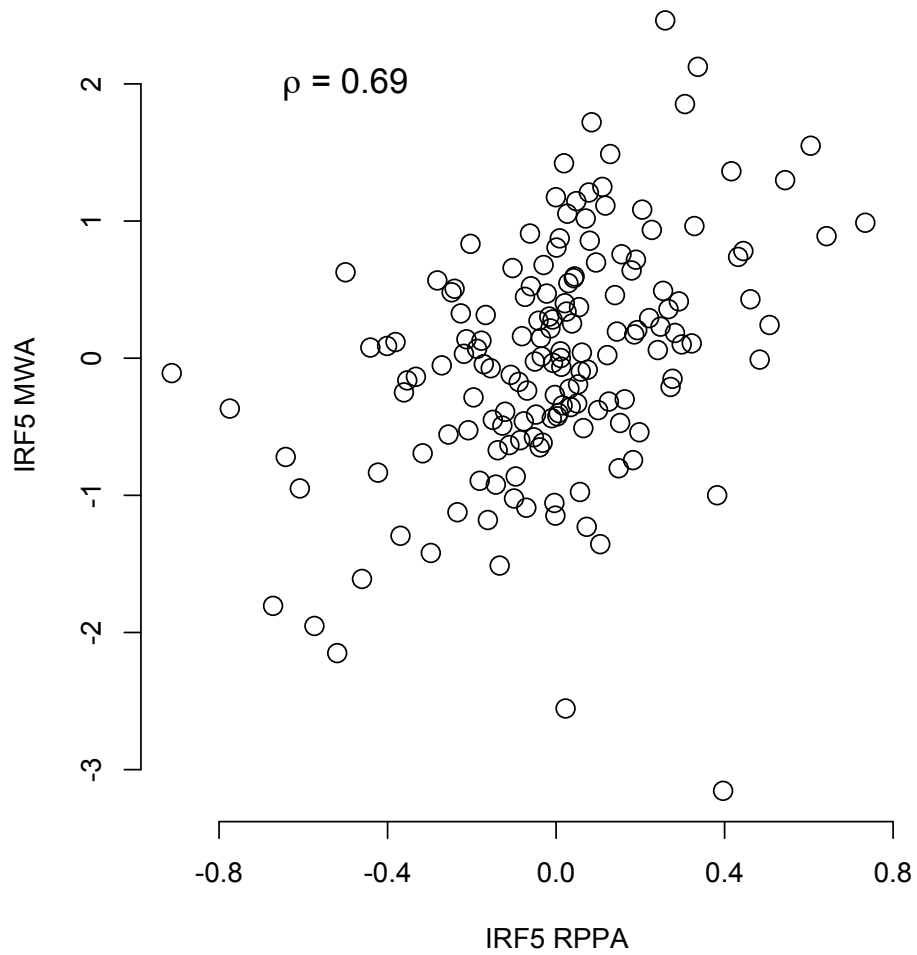

**Figure S2: Inter-platform correlation.** Correlation between the relative protein levels quantified for the same antibodies across microwesterns (x-axis) versus RPLAs (y-axis) for all 204 samples for an antibody directed against IRF5.

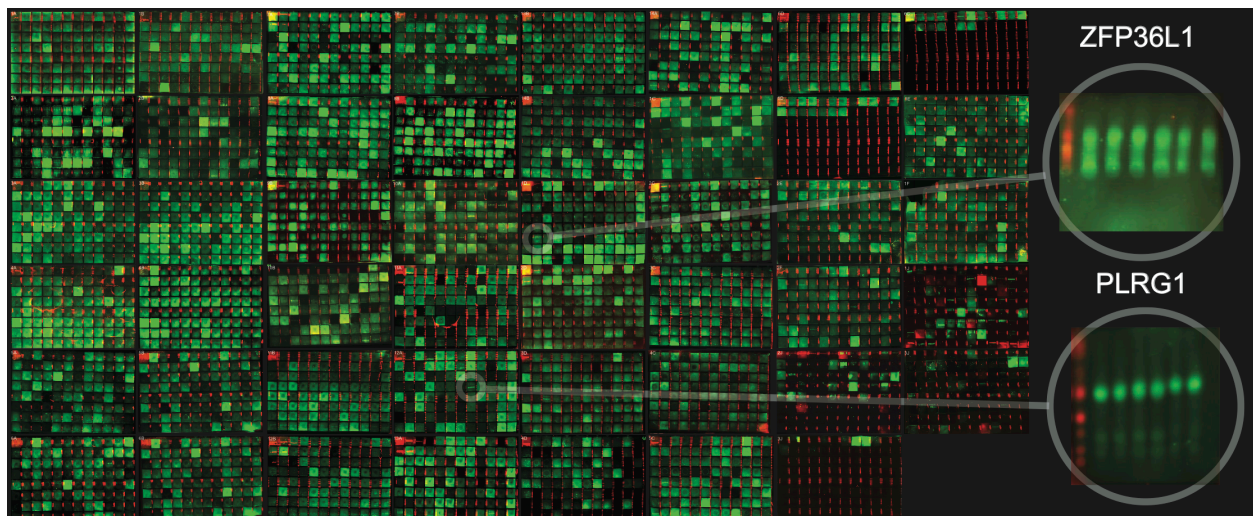

**Figure S3: Sample results from screening 4,366 antibodies across six pooled samples using 96-well microwestern arrays.** Images are shown for one representative blot at a single scan intensity from each plate of screened antibodies at 1:1000 dilutions. ZNFP36L1 passed the screen for subsequent population-level quantification by MWAs, whereas PLRG1 passed the screen for subsequent population-level RPLA quantification.

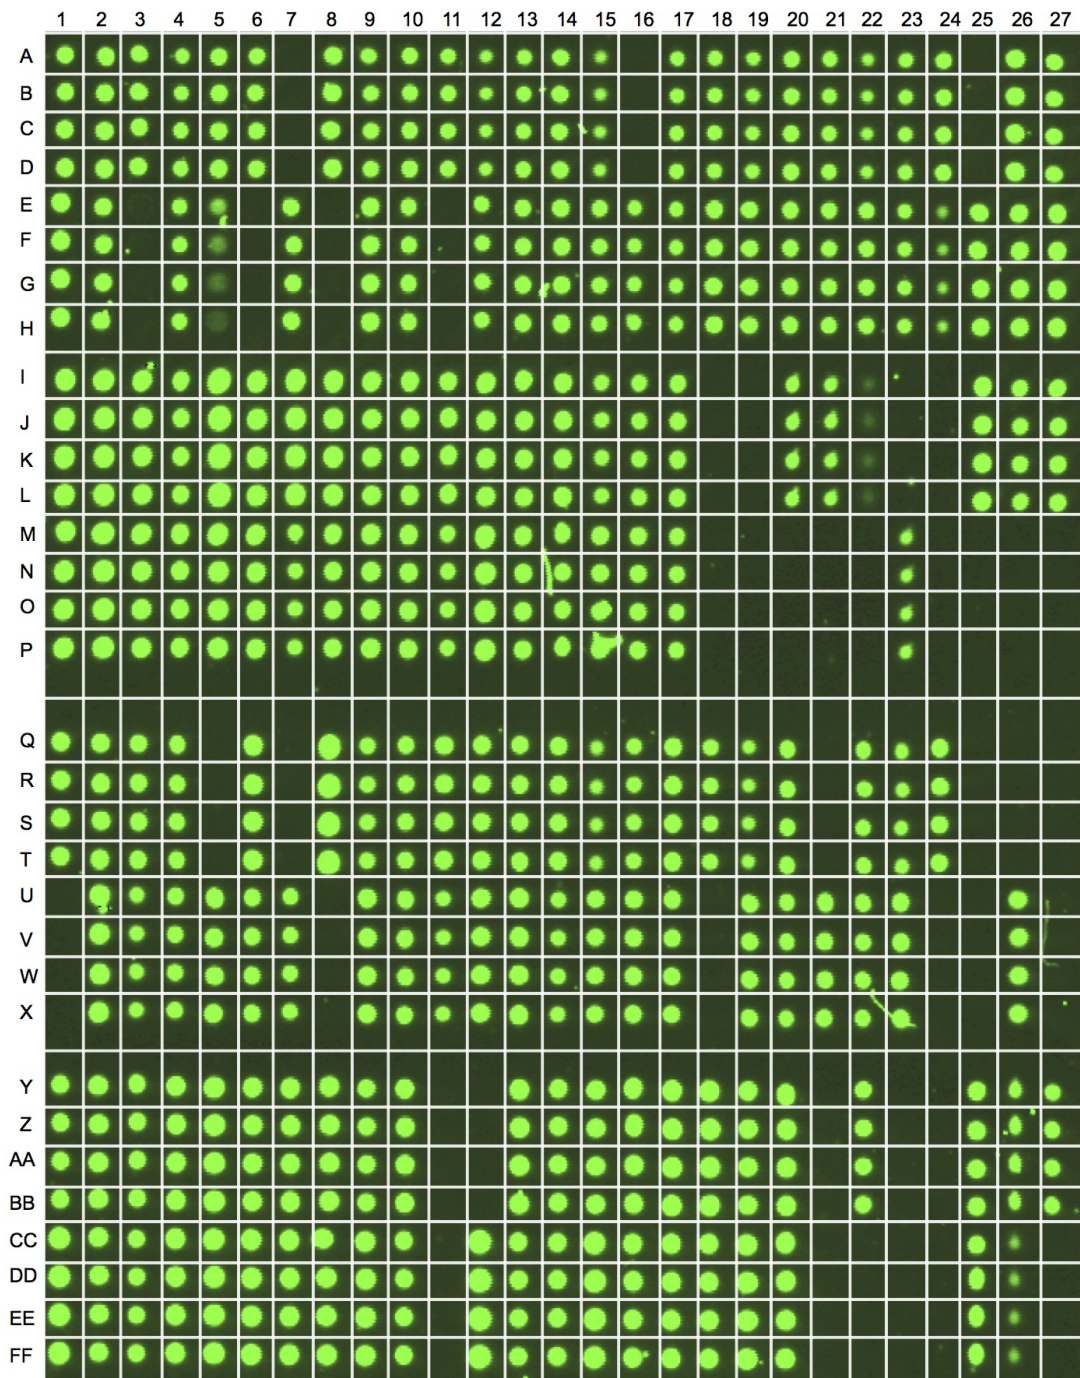

**Figure S4: Sample population-level quantification of DIDO1 (Antibody ID #440) by reverse phase protein arrays.** Sample IDs can be found in Supplementary Table 2.

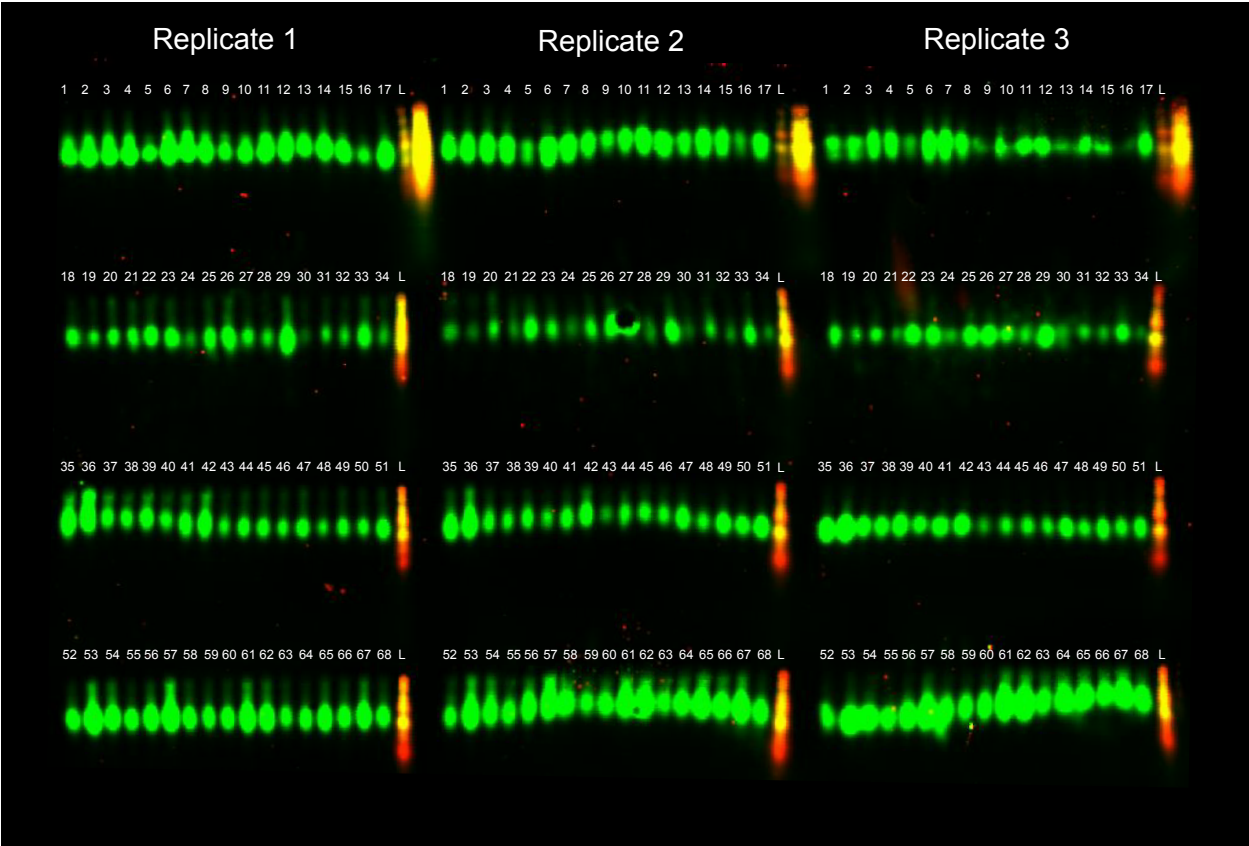

**Figure S5: Sample population-level quantification of Src (Antibody ID# 208) by quadrant microwestern arrays.** Sample IDs can be found in Supplementary Table 3.

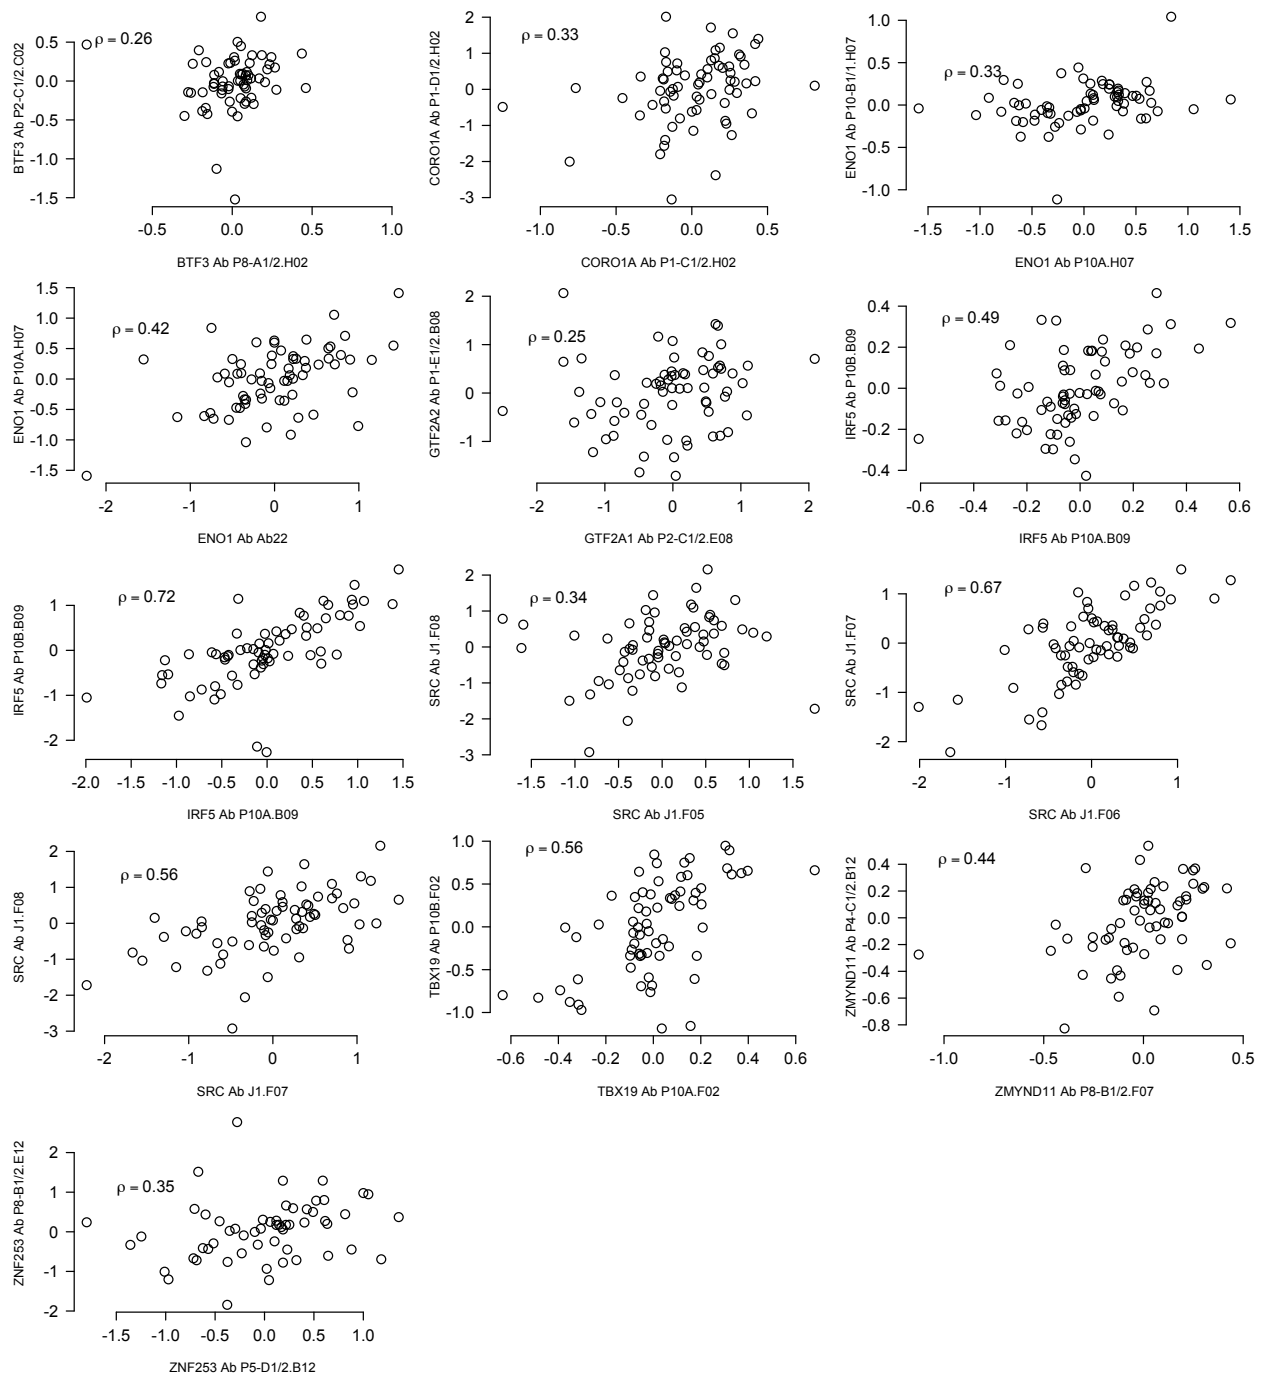

**Figure S6: Inter-antibody correlations.** Correlations between the relative inter-individual protein levels quantified by microwesterns with two distinct antibodies directed against thirteen separate proteins.



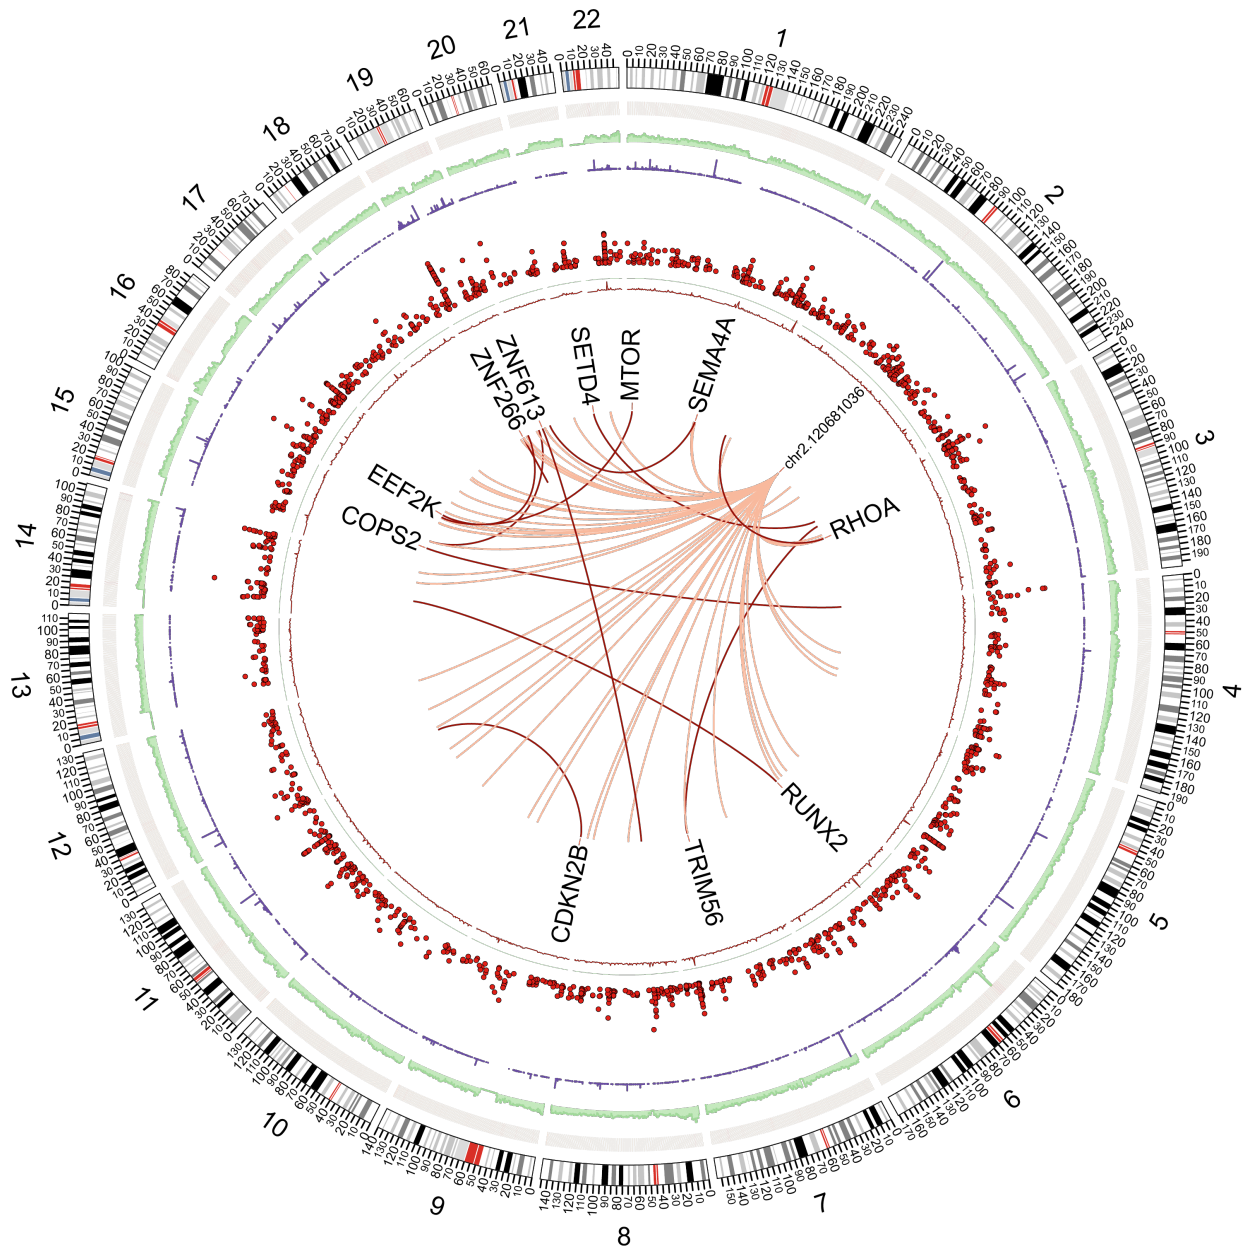

**Figure S7: Genetic variants affecting mRNA levels globally and in cis.** Circos plot for the eQTL association results for the subset of genes that were also quantified at the protein level. The rims, in order from outside inward, depict (1) a Manhattan plot of the  $-\log_{10}(P)$  for each eQTL identified at  $P < 10^{-4}$  (for plotting clarity) and (2) the top 12 (constrained due to space) significant eQTLs ( $P < 10^{-10}$ ) and the top master regulatory SNP for each dataset, and (3) the innermost network depicts spokes between QTLs and their regulated genes, with light red spokes depicting the top QTL interactions and dark red spokes depicting proteins associated with the top master regulatory SNP for each dataset. Such SNPs include chr2.120681036, which marks an mRNA-specific master regulatory region.



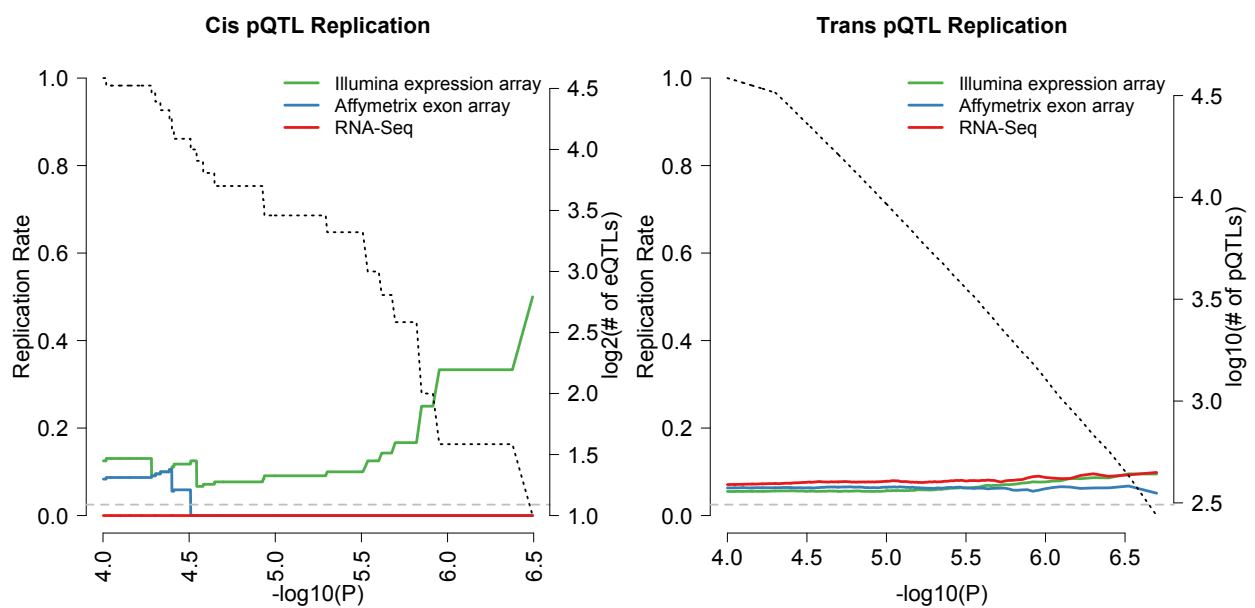

**Figure S8: pQTL evidence at the mRNA level.** **a.** *cis*- and **b.** *trans*-pQTL replication rate (y-axis) is depicted as a function of the  $P$ -value in the protein data (x-axis) for Illumina expression array (green), Affymetrix exon array (blue) and transcriptome sequencing (red). The black dashed lines denote the number of eQTLs at each discovery  $P$ -value. The grey dashed line denotes the null expectation of replication rate at  $P < 0.05$  with concordant effect direction.

**Supplementary Table S1 - siRNA lists**

**FlexiTube GeneSolution GS11083 for DIDO1**

Entrez gene ID: 11083 (4 siRNAs, 1 nmol each)

SI03080042

SI03111185

SI00132552

SI00132559

**FlexiTube GeneSolution GS10025 for MED16**

Entrez gene ID: 10025 (4 siRNAs, 1 nmol each)

SI02635346

SI03057103

SI00077854

SI00077868

**FlexiTube GeneSolution GS3235 for HOXD9**

Entrez gene ID: 3235 (4 siRNAs, 1 nmol each)

SI04249028

SI04907700

SI04157846

SI04205873

**FlexiTube GeneSolution GS7633 for ZNF79**

Entrez gene ID: 7633 (4 siRNAs, 1 nmol each)

SI03230836

SI04339748

SI03140879

SI03170300

**FlexiTube GeneSolution GS221785 for ZNF498**

Entrez gene ID: 221785 (4 siRNAs, 1 nmol each)

SI04324089

SI04360923

SI03124303

SI04223583

**FlexiTube GeneSolution GS3196 for TLX2**

Entrez gene ID: 3196 (4 siRNAs, 1 nmol each)

SI00745836

SI04370730

SI00745815

SI00745822

**FlexiTube GeneSolution GS11151 for CORO1A**

Entrez gene ID: 11151 (4 siRNAs, 1 nmol each)

SI03231753

SI04364948

SI00351848

SI03188507

**FlexiTube GeneSolution GS7287 for TULP1**

Entrez gene ID: 7287 (4 siRNAs, 1 nmol each)

SI00050764

SI03067750

SI00050750

SI00050757

**FlexiTube GeneSolution for ATF2**

Entrez gene ID: 1386 (4 siRNAs, 1 nmol each)

SI02780309

SI00305872

SI03095946

SI05037508

**FlexiTube GeneSolution GS148266 for ZNF569**

Entrez gene ID: 148266 (4 siRNAs, 1 nmol each)

SI04219628

SI04372963

SI03156503

SI04202639

**FlexiTube GeneSolution GS8243 for SMC1A**

Entrez gene ID: 8243 (4 siRNAs, 1 nmol each)

SI02655219 (Experimentally verified)

SI00087241

SI00087255

SI00087248

**FlexiTube GeneSolution GS6194 for RPS6**

Entrez gene ID: 6194 (4 siRNAs, 1 nmol each)

SI04339860

SI04342821

SI00708008

SI04219152

**FlexiTube GeneSolution GS3071 for NCKAP1L**

Entrez gene ID: 3071 (4 siRNAs, 1 nmol each)

SI04298112

SI04316851

SI00435568  
SI04235602

**FlexiTube GeneSolution STAT3**

1. SI02662338
2. SI00048377
3. SI02662898
4. SI00048384
5. SI00048363
6. SI00048370

**Flexitube GeneSolution GS3735 for KARS**

Entrez gene ID: 3735 (4 siRNAs, 1 nmol each)

SI00450422  
SI03241588  
SI04212075  
SI04262069
